# Supplementary material for: Defining acute flares in knee osteoarthritis: a systematic review
Source: PubMed Central journal article supplement — BMJ Open. 2018 Jul 19;8(7):e019804. doi: 10.1136/bmjopen-2017-019804 (PMC6059300; doi:10.1136/bmjopen-2017-019804), 2018-07-19
Supplement: bmjopen-2017-019804supp001.pdf [file bmjopen-2017-019804supp001.pdf]

## Online supplement: Example search strategy

Table 1: Key terms and MeSH headings used for EMBASE database search. The concepts were combined as follows: "KNEE JOINT" AND "ACUTE EVENTS"

| Concepts     | Search terms                                                                                                                                                                   |
|--------------|--------------------------------------------------------------------------------------------------------------------------------------------------------------------------------|
| KNEE JOINT   | "knee adj3 (pain OR painful)" or<br>"Knee osteoarthritis" or<br>"knee adj3 (arthrosis)" or<br>"knee adj3 (joint OR joints OR degenerative)" or<br>"knee adj3 (osteoarthritis)" |
| ACUTE EVENTS | "exacerbation" or "flare" or "daily adj3 (pain)" or "pain AND (diary OR diaries)" or "pain adj3 (variab\$)"                                                                    |
